# Supplementary material for: Limited genetic diversity in the PvK12 Kelch protein in Plasmodium vivax isolates from Southeast Asia
Source: PubMed Central journal article supplement (PMC5100195; doi:10.1186/s12936-016-1583-0), 2016-11-08
Supplement: 12936_2016_1583_MOESM4_ESM.pdf [file 12936_2016_1583_MOESM4_ESM.pdf]

PVX\_080100 ME.....IDINVGGAI FETS RHTLTQQKDSFIEKLLSGRYHVTRDKQGRIFLDRDSELFR IILNFLRNPLTVPIPKDLSESEALLKEAEFYGIK  
PY17X\_1241000 ME.....IDINVGGALFETS RHTLTQQKDSFIEKLLSGRYHITRDKQGRIFLDRDSELFR IILNFLRNPLTIPIPKDLGESEALLKEAEFYGIK  
PBANKA\_1237800 ME.....IDINVGGALFETS RHTLTQQKDSFIEKLLSGRYHITRDKQGRIFLDRDSELFR IILNFLRNPLTIPIPKDLGESEALLKEAEFYGIK  
PCHAS\_1238200 ME.....IDINVGGALFETS RHTLTQQKDSFIEQLLSGRYHITRDKQGRIFLDRDSELFR IILNFLRNPLTIPIPKDLGESEALLKEAEFYGIK  
PF3D7\_1343700 ME.....IDINVGGAI FETS RHTLTQQKDSFIEKLLSGRHHVTRDKQGRIFLDRDSELFR IILNFLRNPLTIPIPKDLSESEALLKEAEFYGIK  
PRCDC\_1342700 ME.....IDINVGGAI FETS RHTLTQQKDSFIEKLLSGRHHVTRDKQGRIFLDRDSELFR IILNFLRNPLTIPIPKDLSESEALLKEAEFYGIK  
PKNH\_1257700 ME.....IDINVGGAI FETS RHTLTQQKDSFIEKLLSGRYHVTRDKQGRIFLDRDSELFR IILNFLRNPLTVPIPKDLSESEALLKEAEFYGIK  
PCYB\_122000 ME.....IDINVGGAI FETS RHTLTQQKDSFIEKLLSGRYHVTRDKQGRIFLDRDSELFR IILNFLRNPLTVPIPKDLSESEALLKEAEFY---

PVX\_080100 FLPFPLVFCMGGFDGVEYLN SMELLDISQQCWRMCTPMSTKKAYFGSAVLN NFLYVFGGNNYDYKALFETEYVDRLRDTW FVSSNLNIPRRNNGV  
PY17X\_1241000 FLPFPLVFSIGGFDGVEYLN SMELLDISQQCWRMCTPMSTKKAYFGSAVLN NFLYVFGGNNYDYKALFETEYVDRLRDTW FLSSNLNIPRRNNGI  
PBANKA\_1237800 FLPFPLVFSIGGFDGVEYLN SMELLDISQQCWRMCTPMSTKKAYFGSAVLN NFLYVFGGNNYDYKALFETEYVDRLRDTW FLSSNLNIPRRNNGI  
PCHAS\_1238200 FLPFPLVFCIGGFDGVEYLN SMELLDISQQCWRMCTPMSTKKAYFGSAVLN NFLYVFGGNNYDYKALFETEYVDRLRDTW FLSSNLNIPRRNNGI  
PF3D7\_1343700 FLPFPLVFCIGGFDGVEYLN SMELLDISQQCWRMCTPMSTKKAYFGSAVLN NFLYVFGGNNYDYKALFETEYVDRLRDTW VVSSNLNIPRRNNGV  
PRCDC\_1342700 FLPFPLVFCIGGFDGVEYLN SMELLDISQQCWRMCTPMSTKKAYFGSAVLN NFLYVFGGNNYDYKALFETEYVDRLRDTW VVSSNLNIPRRNNGV  
PKNH\_1257700 FLPFPLVFCMGGFDGVEYLN SMELLDISQQCWRMCTPMSTKKAYFGSAVLN NFLYVFGGNNYDYKALFETEYVDRLRDTW FVSSNLNIPRRNNGV  
PCYB\_122000 -----VFCMGGFDGVEYLN SMELLDISQQCWRMCTPMSTKKAYFGSAVLN NFLYVFGGNNYDYKALFETEYVDRLRDTW FVSSNLNIPRRNNGV

PVX\_080100 TSNGRIYCIIGGYDGSS IIPNVEAYDHRMKAWVEIAPLNTPRSSSMCVAFDNKIYVIGGTNGERLNSIEVYDEKMNKWEQFPYALLEARSSGAAFN Y  
PY17X\_1241000 TSNGRIYCIIGGYDGSS IIPNVEAYDHRMKAWIEVAPLNTPRSSAMCVAFDNKIYVVGANGERLNSIEVYDEKMNKWFNFPYALLEARSSGAAFN Y  
PBANKA\_1237800 TSNGRIYCIIGGYDGSS IIPNVEAYDHRMKAWIEVAPLNTPRSSAMCVAFDNKIYVVGANGERLNSIEVYDEKMNKWFNFPYALLEARSSGAAFN Y  
PCHAS\_1238200 TSNGRIYCIIGGYDGSS IIPNVEAYDHRMKAWIEVAPLNTPRSSAMCVAFDNKIYVIGGANGERLNSIEVYDEKMNKWEKFPYALLEARSSGAAFN Y  
PF3D7\_1343700 TSNGRIYCIIGGYDGSS IIPNVEAYDHRMKAWVEVAPLNTPRSSAMCVAFDNKIYVIGGTNGERLNSIEVYEEKMNKWEQFPYALLEARSSGAAFN Y  
PRCDC\_1342700 TSNGRIYCIIGGYDGSS IIPNVEAYDHRMKAWVEVAPLNTPRSSAMCVAFDNKIYVIGGTNGERLNSIEVYEEKMNKWEQFPYALLEARSSGAAFN Y  
PKNH\_1257700 TSNGRIYCIIGGYDGSS IIPNVEAYDHRMKAWVEIAPLNTPRSSSMCVAFENKIYVIGGTNGERLNSIEVYDEKMNKWEQFPYALLEARSSGAAFN Y  
PCYB\_122000 TSNGRIYCIIGGYDGSS IIPNVEAYDHRMKAWVEIAPLNTPRSSSMCVAFDNKIYVIGGTNGERLNSIEVYDEKMNKWEQFPYALLEARSSGAAFN Y

PVX\_080100 LNQIYVVGIDNEHNILDSVEQYQPFNKRWQFLNGVPEKKNMFGAATLSDSYIITGGENGVDLNSCHFFSPDTNEWQIGPSLLVPRFGH SVLIANI  
PY17X\_1241000 LNQIYVVGIDNEHNILESVEQYQPFNKRWQFLNGIPEKKNMFGATLSDSYIITGGENGVDLNSCHFFSPDTNEWQIGPSLLVPRFGH SVLVANI  
PBANKA\_1237800 LNQIYVVGIDNEHNILESVEQYQPFNKRWQFLNGIPEKKNMFGATLSDSYIITGGENGVDLNSCHFFSPDTNEWQIGPPLL VPRFGH SVLVANI  
PCHAS\_1238200 LNQIYVVGIDNEHNILESVEQYQPFNKRWQFLNGIPEKKNMFGATLSDSYIITGGENGVDLNSCHFFSPDTNEWQIGPSLLVPRFGH SVLVANI  
PF3D7\_1343700 LNQIYVVGIDNEHNILDSVEQYQPFNKRWQFLNGVPEKKNMFGAATLSDSYIITGGENGEVLNSCHFFSPDTNEWQLGPSLLVPRFGH SVLIANI  
PRCDC\_1342700 LNQIYVVGIDNEHNILDSVEQYQPFNKRWQFLNGVPEKKNMFGAATLSDSYIITGGENGEVLNSCHFFSPDTNEWQLGPSLLVPRFGH SVLIANI  
PKNH\_1257700 LNQIYVVGIDNEHNILDSVEQYQPFNKRWQFLNGVPEKKNMFGAATLSDSYIITGGENGVDLNSCHFFSPDTNEWQIGPSLLVPRFGH SVLIANI  
PCYB\_122000 LNQIYVVGIDNEHNILDSVEQYQPFNKRWQFLNGVPEKKNMFGAATLSDSYIITGGENGVDLNSCHFFSPDTNEWQIGPSLLVPRFGH SVLIANI
