# Supplementary material for: Limited genetic diversity in the PvK12 Kelch protein in Plasmodium vivax isolates from Southeast Asia
Source: PubMed Central journal article supplement (PMC5100195; doi:10.1186/s12936-016-1583-0), 2016-11-08

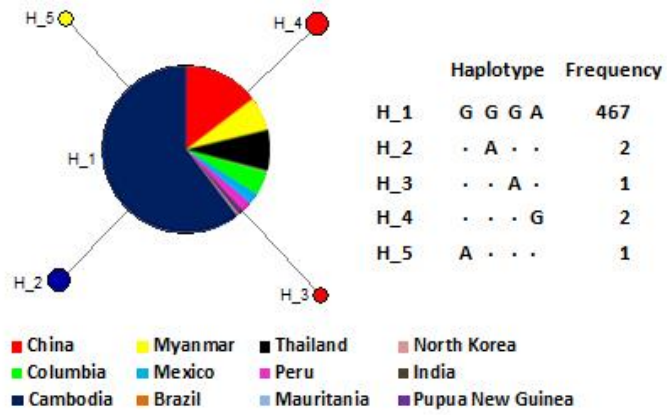

Supplement: 12936_2016_1583_MOESM6_ESM.pdf [file 12936_2016_1583_MOESM6_ESM.pdf]
