# Supplementary material for: Limited genetic diversity in the PvK12 Kelch protein in Plasmodium vivax isolates from Southeast Asia
Source: Springer Nature journal article supplement (doi:10.1186/s12936-016-1583-0), 2016-11-08
Supplement: MOESM3 [file 11029224]

|                   |     |                                                                         |     |
|-------------------|-----|-------------------------------------------------------------------------|-----|
| <i>P. v</i> Kelch | 255 | EEQKLHDERKKLDIDISNGYKQIKKEKEEHRKRFD---EERLRFLQEIDKIKLVLYLEKEKYFQEYKN    | 319 |
| Tho2 family       | 32  | EIEKLEKNIKELDSK-SSGIDKKKKEKKRLKSLIKklkEELKKHIEHNEKTKKRLSEEKSSWFPSKN     | 98  |
| <i>P. c</i> Kelch | 220 | ELSDSSDFE---NMvgDLRiTFINWIKKTQMNFIREFEKEKLFKDKKELEME-RIRLYKEIEN-RKNIEEQ | 284 |
| CDC_37N family    | 11  | ELSDSDIEvhpNV--DKK-SFIRW-KQDIHQARVERMEEIKNLKYELImNDHLNKRIDKILKGLREE     | 76  |
| <i>P. c</i> Kelch | 285 | KLQDERKKLDIDISNGYKQIKKEKEEHRKRFDDERLRFLQEIDKIKLVLYLEKEKYFQEYKnfEINDKKKI | 353 |
| CDC 37N family    | 77  | ELSPETPTYNEMLAELQDLKKELEEANGDSEGLLEELKKHRDKLKEQKELRKKLDELEK---EKKKI     | 142 |
