# Supplementary material for: Limited genetic diversity in the PvK12 Kelch protein in Plasmodium vivax isolates from Southeast Asia
Source: Springer Nature journal article supplement (doi:10.1186/s12936-016-1583-0), 2016-11-08
Supplement: MOESM5 [file 11029224]

|             |                                                                                                  |     |
|-------------|--------------------------------------------------------------------------------------------------|-----|
| PVX_080100  | MEGEKIKSNSISNFSVTYERESGANSNSDDKSVSSSENESENSFMNLTSDKNEKTENNSFILNNSFANMKDSLLESIDLVLDSNFDKDFLPS     | 95  |
| KEAP1_Human | MQP-----DPRPSGA-----GACCRFLPLQSQCPPEGAGDA-----VMYASTECKAEVTPS                                    | 45  |
| PVX_080100  | NLS-----KNFNNL-----SKENLGNKYLNKLLNKSDSMFMSKGMNLMENNLSNNLPVKSSNKKEGFMDSST---PINAN                 | 165 |
| KEAP1_Human | QHGNRTFSYTTLEDHTKQAFGI MNELRLSQQLCDVTLQVKYQD----APAAQFMAHKVVL-----ASSSPVKAMFTNGLREQGMEVVSIEGI    | 128 |
| PVX_080100  | EDNAMNNLKKYSNANNINDTYEKKI IETELSDSSDFENMVGLRITFINWLKKTQMNFI REKDKLFDKKELEMERIRLYKEIENRKSIEEQKLH  | 260 |
| KEAP1_Human | HPKVMERLIEFAYTASIS-----MGEKCVLHVMNGAVMYQ-IDSVVRACSDFLVQQL---DPSNAIG---IANFA-----EQIGCVLH         | 201 |
| PVX_080100  | DERKKLDIDISNGYKQIKKEKEEHRKRFDEERLRFLEIDKIKLVLYLEKEYF--QEYKNFENDKKKI-----VDANIATEMTIDINVGGA       | 345 |
| KEAP1_Human | QRAREY---IYMHFGEVAKQ---EEFFNLSHCQLVTLISRDDLNVRCSEVFHACINWVKYDCQRRFYVQALLRAVRC HSLTPNFLQMQLKQC    | 289 |
| PVX_080100  | -IFETSRHTLTQQKDSFIEKLLS-----G---RYHVTRDKQGRIFLDRDSELFRILNFLRNPLTVPIPKD-LSESEALLKEAEFYGIKFLPFFL   | 430 |
| KEAP1_Human | EILQSDS-----RCKDYLVKIFEELTLHKPTQVMPCRAPKVGRLIYT-AGGYFRQSLSYLEAYN--PSDGTWLRLADLQVPRSLAG--CVVGGL   | 374 |
| PVX_080100  | VFCMGGFD----GVEYLNSMELLDISQQCWRMCTPMSTKKAYFGSAVLNINFLYVFGNNYDYKALFETEYDRLRDTWVSSNLNIPRRNNGVT     | 521 |
| KEAP1_Human | LYAVGGRNNSPDGNTDSSALDCYNPMTNQWSPCAPMSVPRNRIGVGVIDGHIYAVGGSHGCI-HHNSVERYEPERDEWHLVAPMLTRRIGVAV    | 468 |
| PVX_080100  | SNGRIYCIIGGYDGSSII PNVEAYDHRMKAWVEIAPLNTPRSSMCVAFDNKIYVIGGTNGE-RLNSIEVYDEKMNKWEQFPYALLEARSSGAAFN | 616 |
| KEAP1_Human | LNRLLYAVGGFDGTNRLNSAECYYPERNWRMITAMNTIRSGAGVCVLHNCIYAAGGYDGDQLNSVERYDVETETWTFVAPMK-HRRSALGITV    | 562 |
| PVX_080100  | YLNQIYVVGIDNEHNILDSVEQYQPFNKRWQFLNGVPEKKMNFGAATLSDSYIITGGENDVLNSCHFFSPDTNEWQIGPSLLVPRFGHSLVLIANI | 712 |
| KEAP1_Human | HQGRIYVLGGYD-GHTFLDSVECYDPDPTDWSEVTRMTSGRSGVGVAVTMEPCRKQI-----DQQNCTC-----                       | 624 |
